# Supplementary material for: ChinaCropPhen1km: a high-resolution crop phenological dataset for three staple crops in China during 2000–2015 based on leaf area index (LAI) products
Source: Copernicus journal article supplement (doi:10.5194/essd-12-197-2020), 2020-01-31
Supplement: Supplementary file 1 [file essd-12-197-2020-supplement.pdf]

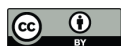

## *Supplement of*

# **ChinaCropPhen1km: a high-resolution crop phenological dataset for three staple crops in China during 2000–2015 based on leaf area index (LAI) products**

**Yuchuan Luo et al.**

*Correspondence to:* Zhao Zhang ([sunny\\_zhang@bnu.edu.cn](mailto:sunny_zhang@bnu.edu.cn))

The copyright of individual parts of the supplement might differ from the CC BY 4.0 License.

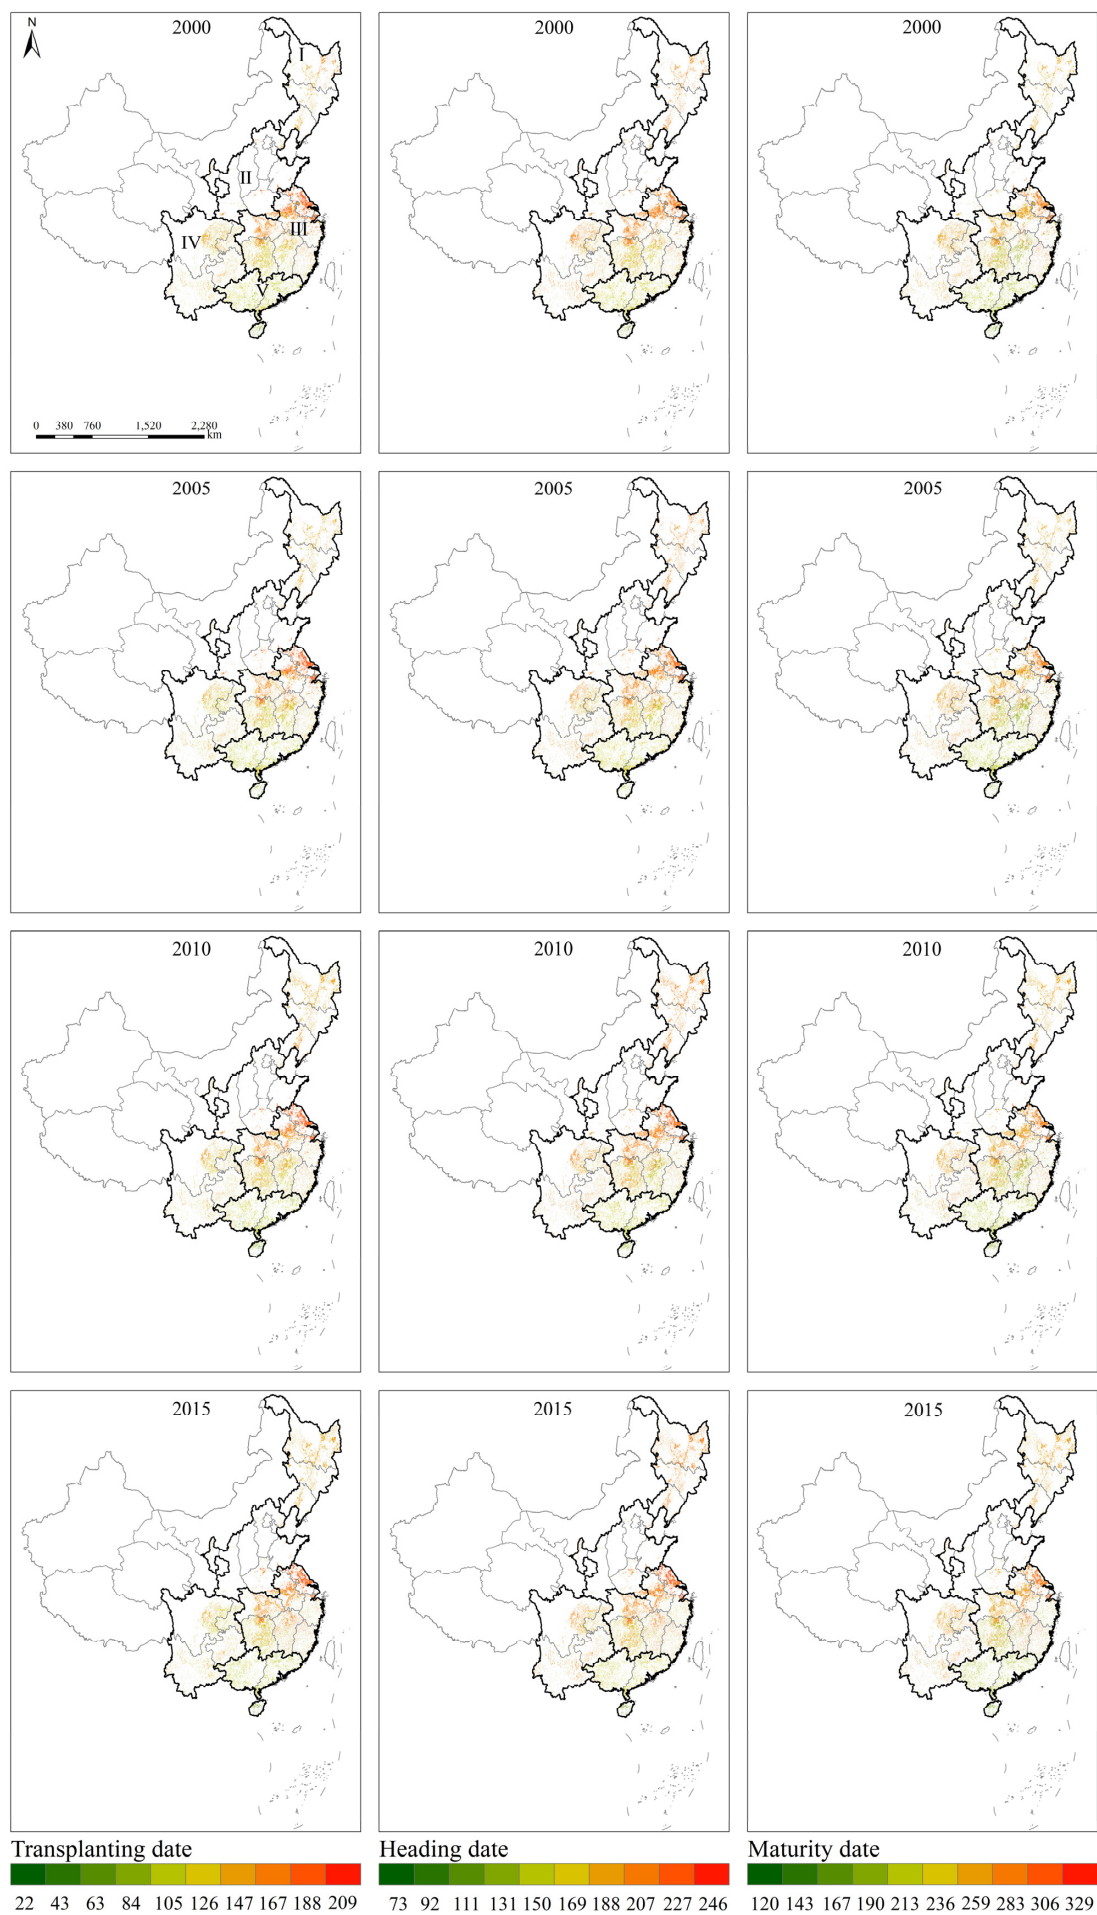

Fig. S1 Spatial patterns of annual three key phenological dates during 2000~2015 for rice.

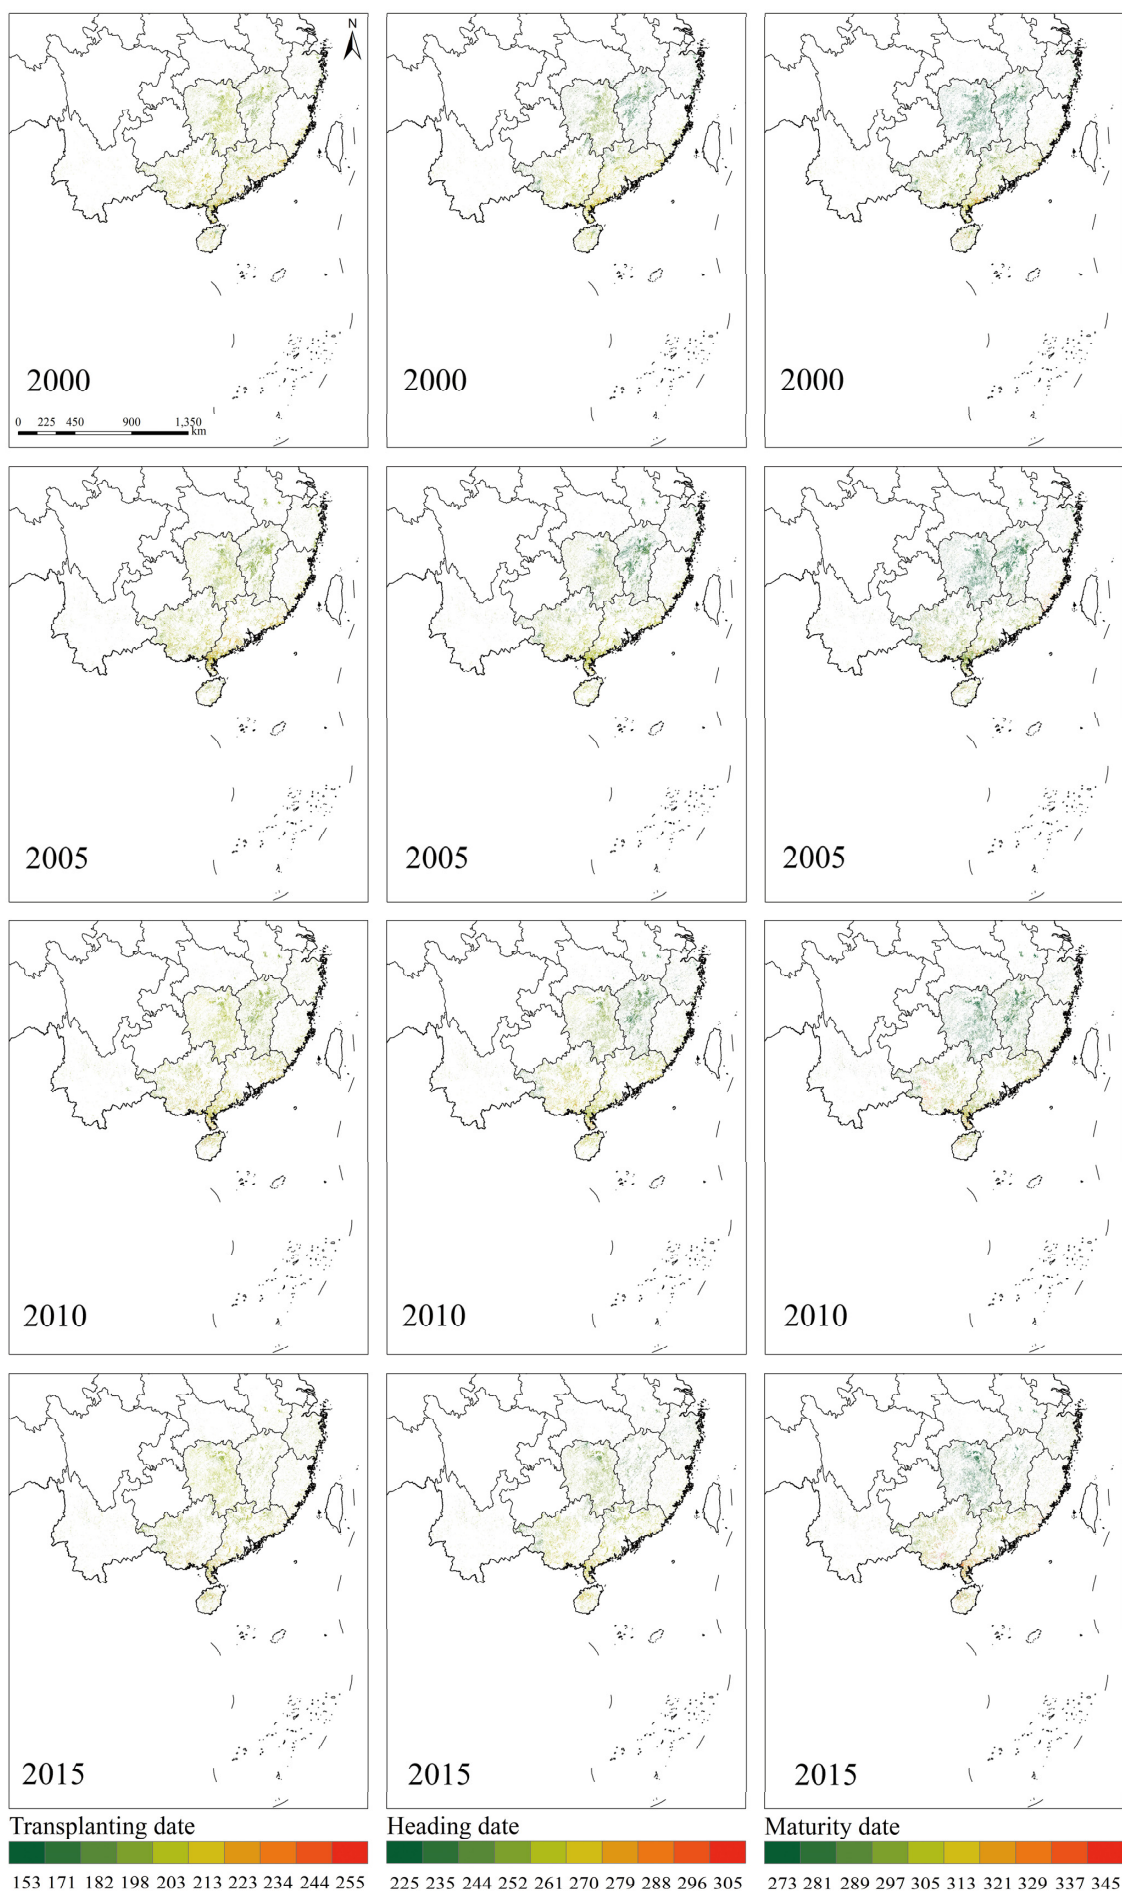

Fig. S2 Spatial patterns of annual three key phenological dates during 2000~2015 for late-rice.

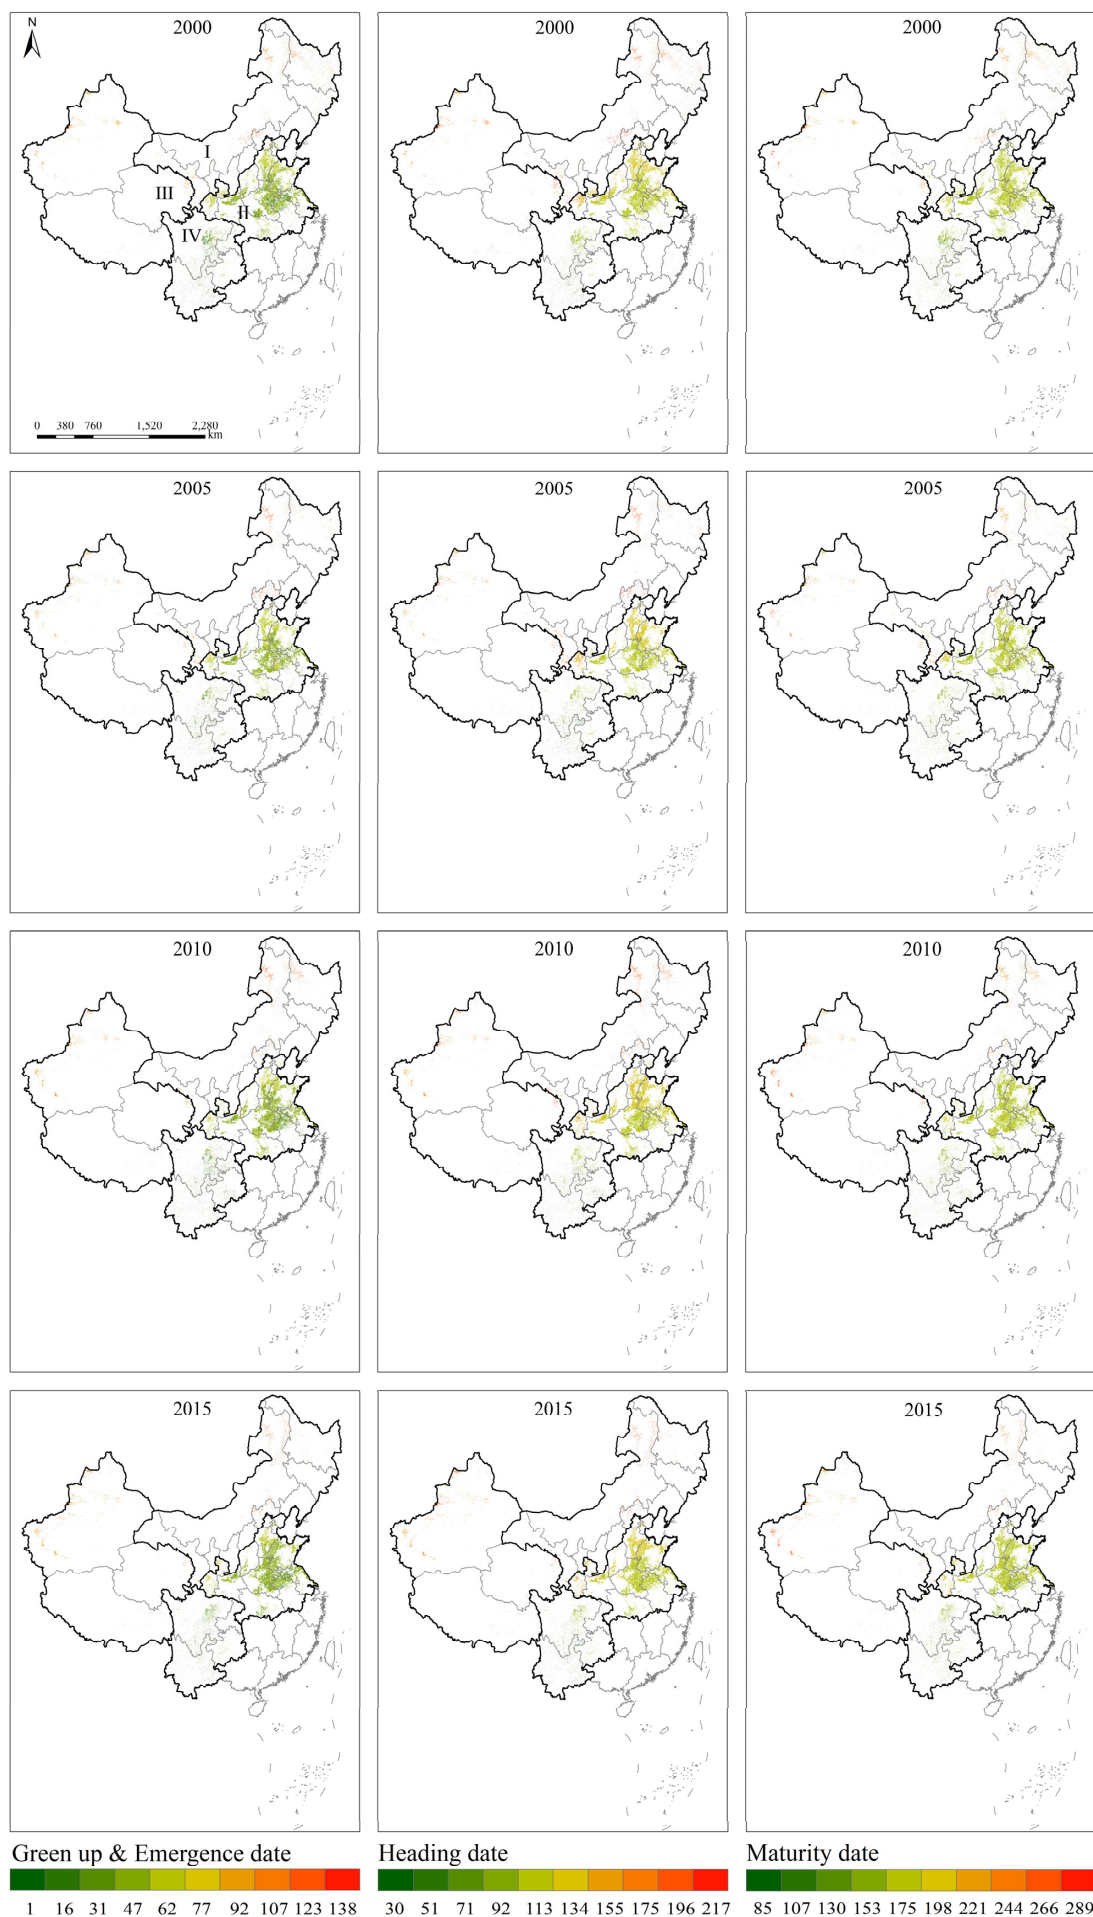

Fig. S3 Spatial patterns of annual three key phenological dates during 2000~2015 for wheat.



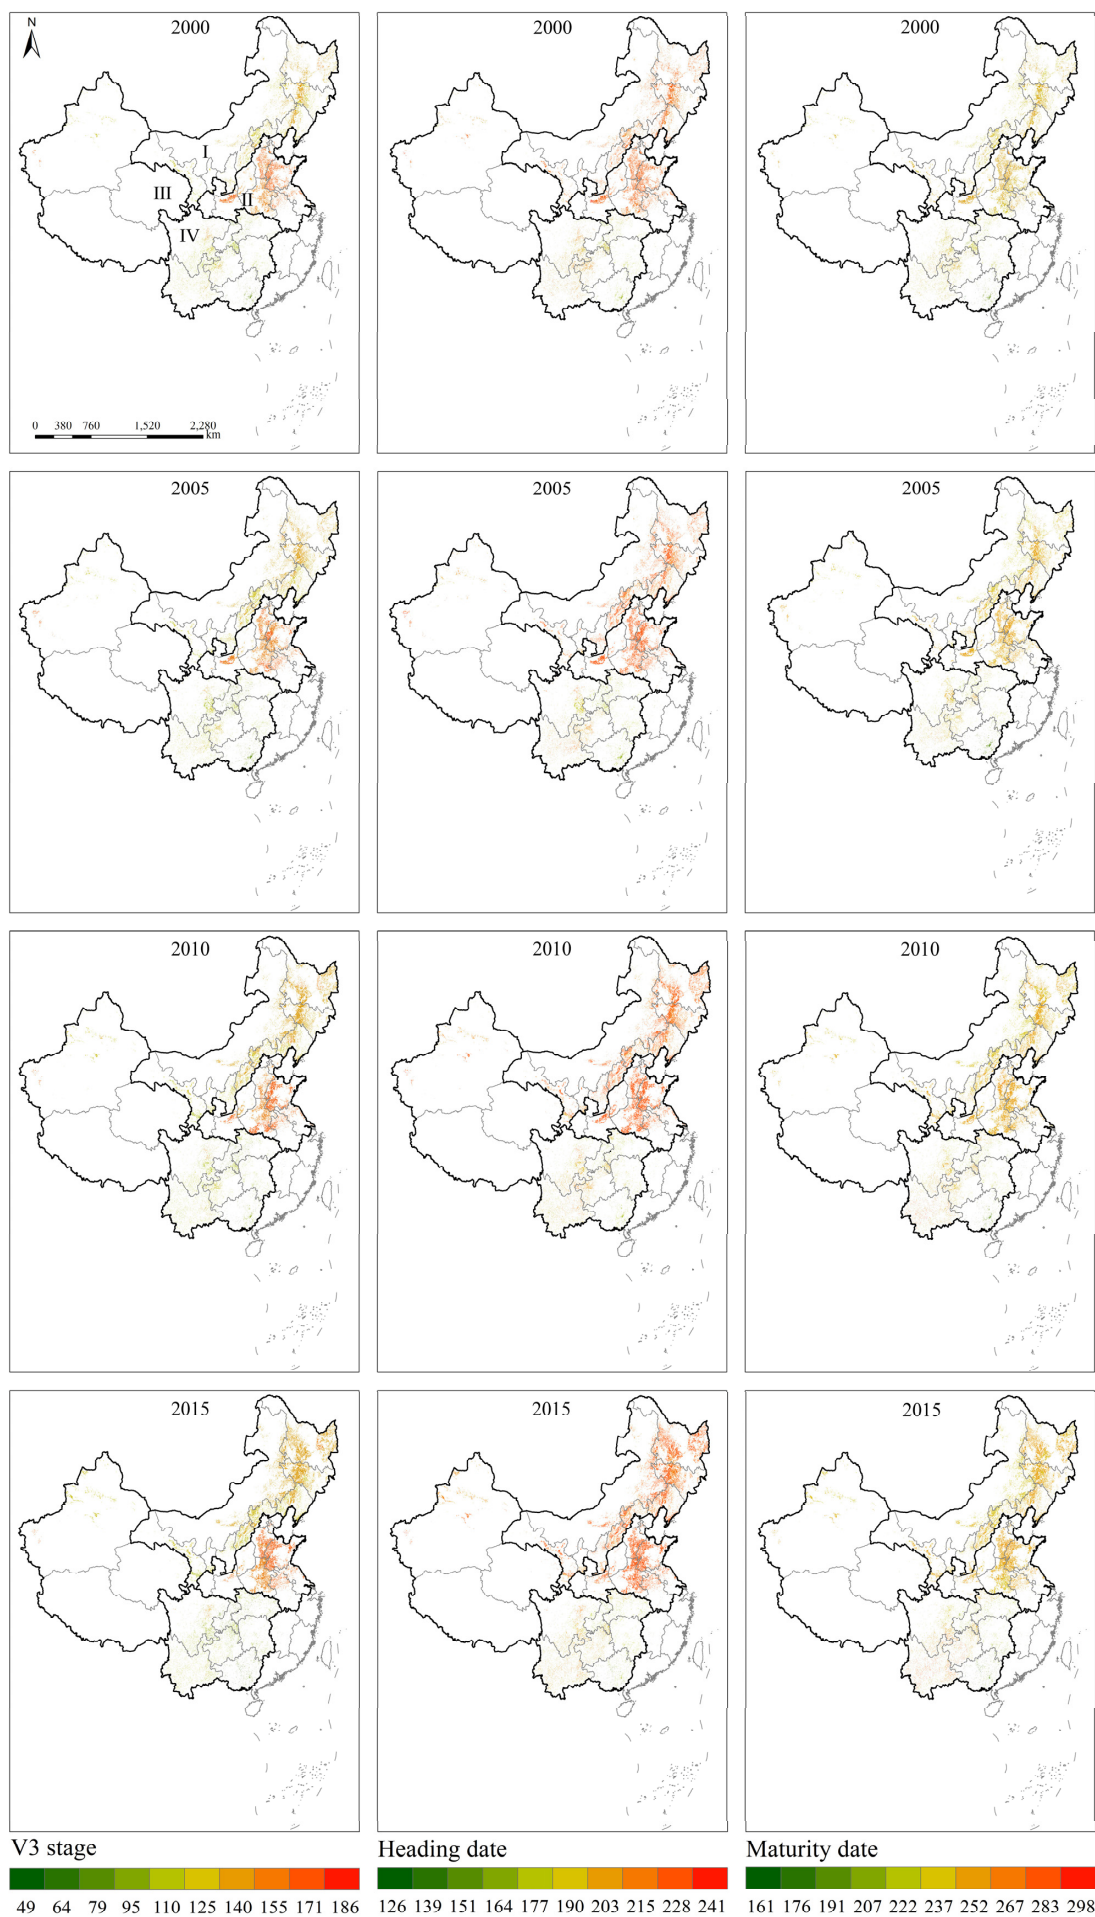

Fig. S4 Spatial patterns of annual three key phenological dates during 2000~2015 for maize

Table S1. Details of the subregions for rice.

| Items                                   | I               | II                | III                                           | IV                        | V                         |
|-----------------------------------------|-----------------|-------------------|-----------------------------------------------|---------------------------|---------------------------|
| Location                                | Northeast China | North China Plain | The middle and lower reaches of Yangtze River | Southwest China           | Southern China            |
| Dominant crops                          | Single-rice     | Single-rice       | Single-rice;<br>Double cropping rice          | Single-rice               | Double cropping rice      |
| Cropping System                         | Single cropping | Single cropping   | Double or Triple cropping                     | Double or Triple cropping | Double or Triple cropping |
| Climate type                            | Temperate       | Subtropical       | Subtropical                                   | Subtropical               | Subtropical               |
| Annual mean temperature (°C)            | 1~7             | 9~15              | 15~18                                         | 16~24                     | 17~24                     |
| Annual total precipitation (mm)         | 400~1000        | 580~1000          | 700~1300                                      | 800~1600                  | 1000~2000                 |
| Annual accumulated temperature (>10 °C) | 2000~3100       | 2750~4900         | 4500~5500                                     | 3500~6000                 | 6500~8000                 |
| Proportion of total planting area (%)   | 14.7            | 3.2               | 51.2                                          | 14.8                      | 16.1                      |

Table S2. Details of the subregions for wheat.

| Items                                   | I               | II                | III                           | IV                        |
|-----------------------------------------|-----------------|-------------------|-------------------------------|---------------------------|
| Location                                | Northern China  | North China Plain | Western China                 | Southwest China           |
| Dominant crops                          | Spring wheat    | Winter wheat      | Spring wheat                  | Winter wheat              |
| Cropping System                         | Single cropping | Double cropping   | Single cropping               | Double or Triple cropping |
| Climate type                            | Temperate       | Subtropical       | Plateau climate;<br>Temperate | Subtropical               |
| Annual mean temperature (°C)            | 1~13            | 9~15              | 5~10                          | 16~24                     |
| Annual total precipitation (mm)         | 400~980         | 580~1000          | 200~400                       | 800~1600                  |
| Annual accumulated temperature (>10 °C) | 2000~4900       | 2750~4900         | 2056~3615                     | 3500~6000                 |
| Proportion of total planting area (%)   | 15.7            | 72.1              | 5.6                           | 6.6                       |

Table S3. Details of the subregions for maize.

|                                         | I               | II                | III                           | IV                            |
|-----------------------------------------|-----------------|-------------------|-------------------------------|-------------------------------|
| Location                                | Northern China  | North China Plain | Western China                 | Southern China                |
| Dominant crops                          | Spring maize    | Summer maize      | Spring maize;<br>Summer maize | Spring maize;<br>Summer maize |
| Cropping System                         | Single cropping | Double cropping   | Single or Double cropping     | Double or Triple cropping     |
| Climate type                            | Temperate       | Subtropical       | Plateau climate;<br>Temperate | Subtropical                   |
| Annual mean temperature (°C)            | 1~13            | 9~15              | 5~10                          | 16~24                         |
| Annual total precipitation (mm)         | 400~980         | 580~1000          | 200~400                       | 800~1600                      |
| Annual accumulated temperature (>10 °C) | 2000~4900       | 2750~4900         | 2056~3615                     | 3500~6000                     |
| Proportion of total planting area (%)   | 43.7            | 38.1              | 2.6                           | 15.6                          |
